# Supplementary material for: Highly conductive and semitransparent free-standing polypyrrole films prepared by chemical interfacial polymerization
Source: Royal Society of Chemistry journal article supplement (doi:10.1039/c3tc31340a), 2013-01-01
Supplement: c3tc31340a.pdf [file c3tc31340a.pdf]

Supporting Information for

# Highly Conductive and Semitransparent Free-standing Polypyrrole Films Prepared by Chemical Interfacial Polymerization

Guijin Qi,<sup>a</sup> Zhenglong Wu<sup>b</sup> and Huiliang Wang<sup>\*a</sup>

<sup>a</sup>Beijing Key Laboratory of Energy Conversion and Storage Materials, College of Chemistry, Beijing Normal University, Beijing 100875, China.

<sup>b</sup>Analytical and Testing Center, Beijing Normal University, Beijing 100875, China.

Fax: +86 10 58802075; Tel: +86 10 58808081; E-mail: wanghl@bnu.edu.cn.

## Contents:

### Results and discussion

#### *Supporting Figures*

Fig. S1. Raman spectra of the PPy films prepared with different pyrrole concentrations.

Fig. S2. The typical XPS spectra of PPy films prepared with different pyrrole concentrations.

Fig. S3. XPS characterizations of the PPy films prepared with different reaction times.

Fig. S4. SEM image of PPy films prepared by the chemical interfacial polymerization.

Fig. S5. Cross-sectional SEM images of the PPy films prepared with different pyrrole concentrations.

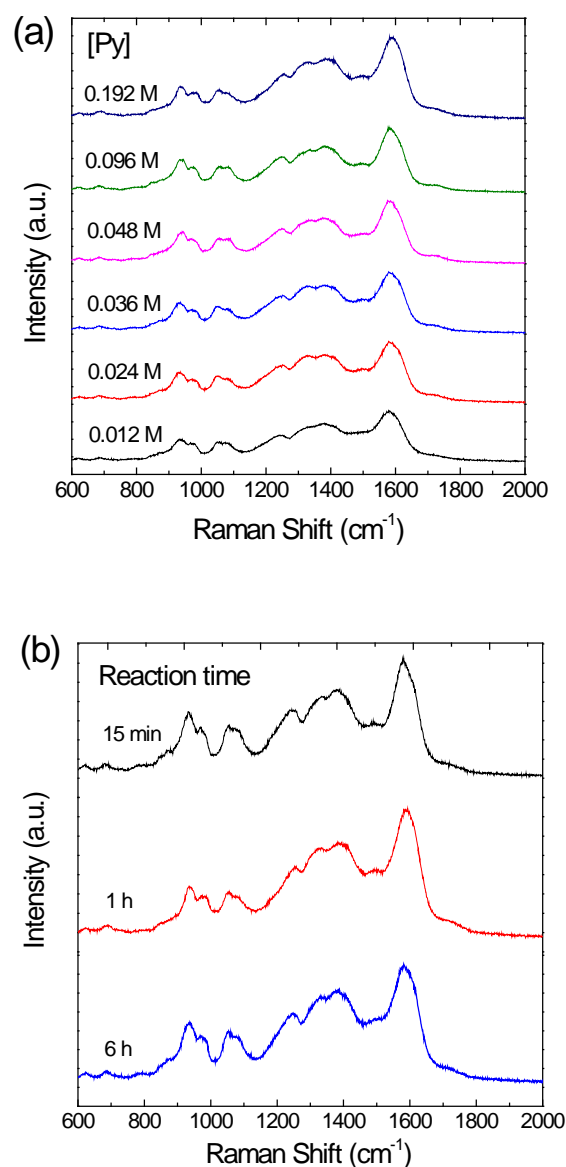

Fig. S1. Raman spectra of the PPy films prepared with different pyrrole concentrations (a) and reaction times (b). Synthetic conditions:  $[\text{FeCl}_3]=[\text{PTS}]=0.36\text{ M}$ , reaction time=25 min (a),  $[\text{Py}]=0.024\text{ M}$  (b).

The intensity ratios of the Raman bands of the symmetric C=C stretching mode at  $1580\text{ cm}^{-1}$  to the skeletal band at  $1500\text{ cm}^{-1}$  ( $I_{1580}/I_{1500}$ ) can also be used to determine the relative conjugation length of the PPy.<sup>1</sup> The intensity ratios are very similar for the PPy films prepared with different pyrrole concentrations and reaction times, and they are in the range of 1.9-2.2.

Reference:

1. L. Dauginet-De Pra and S. Demoustier-Champagne, *Polymer*, 2005, 46, 1583.

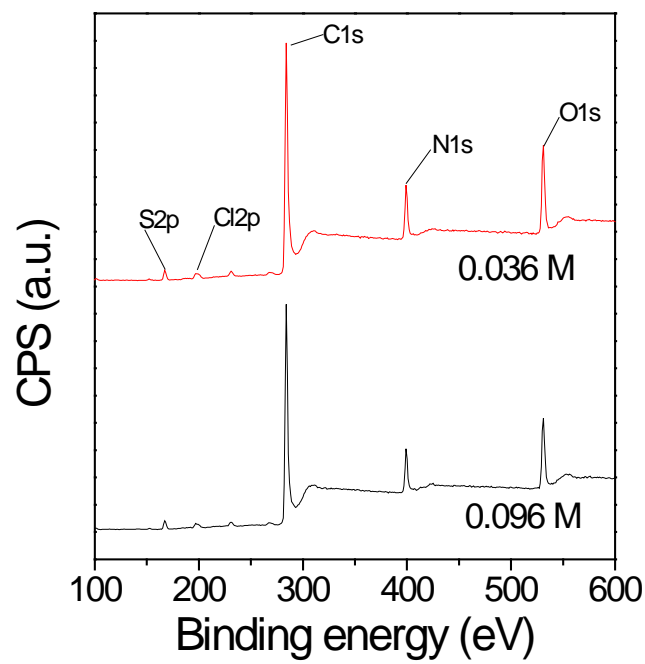

Fig. S2. The typical XPS spectra of PPy films prepared with different pyrrole concentrations.

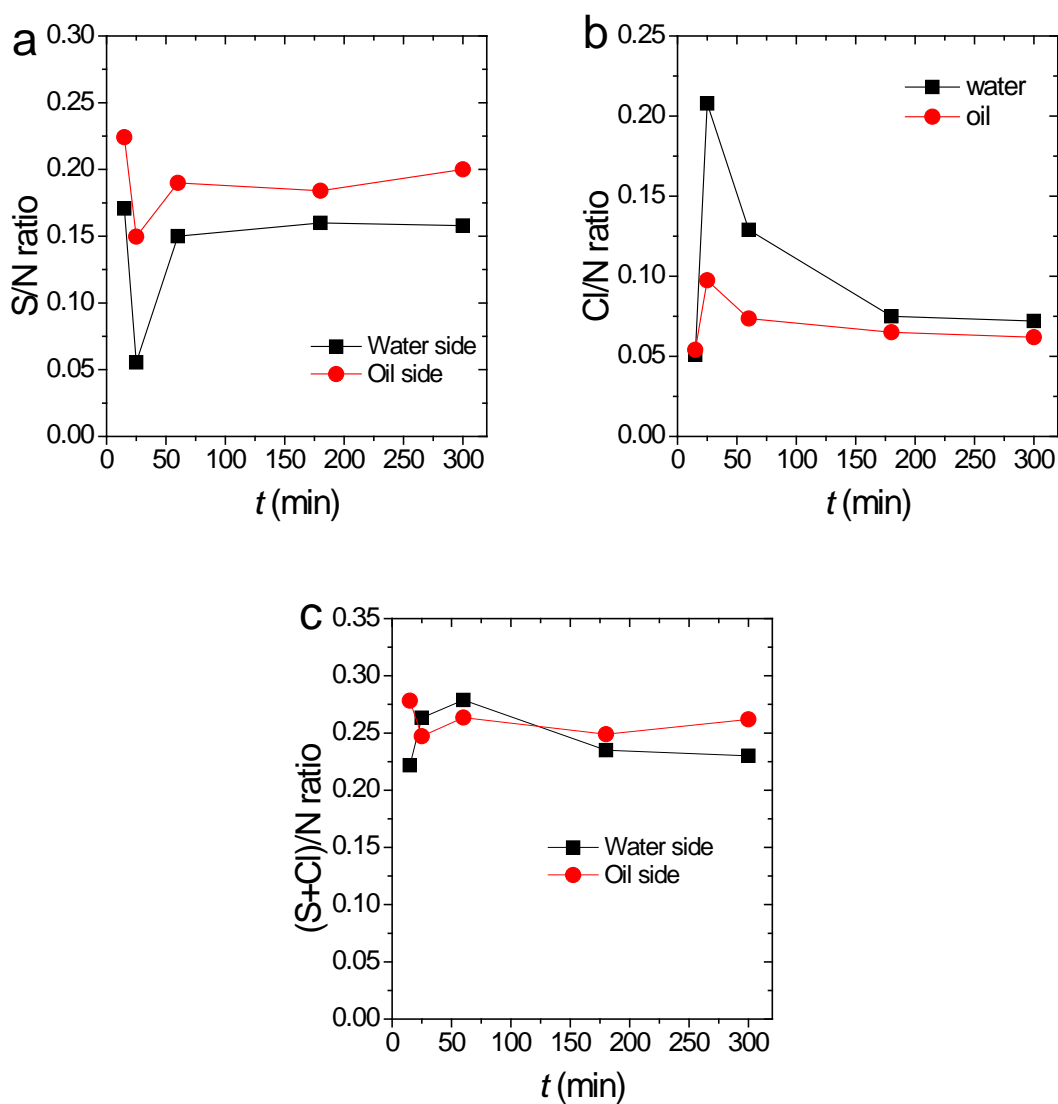

Fig. S3. XPS characterizations of the PPy films prepared with different reaction times. The S/N (a), Cl/N (b) and (S+Cl)/N atomic ratios of the PPy films on the water side and oil (organic) side. Synthetic conditions: [Py]=0.036 M; [FeCl<sub>3</sub>]=[PTS]=0.36 M.

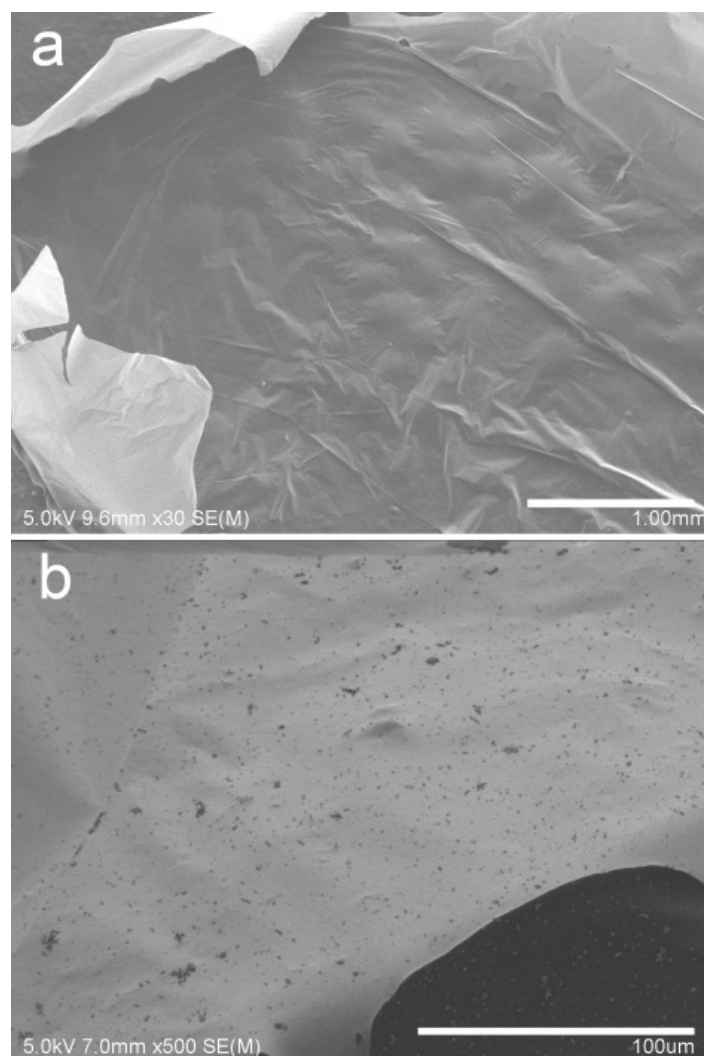

Fig. S4. SEM image of PPy films prepared by the chemical interfacial polymerization. Synthetic conditions:  $[\text{FeCl}_3]=[\text{PTS}]=0.36\text{ M}$ , reaction time= 25 min, and (a):  $[\text{Py}]=0.024\text{ M}$ ; (b):  $[\text{Py}]=0.12\text{ M}$ . Scale bar: 1 mm (a); 100  $\mu\text{m}$  (b).

Fig. S4 shows the morphologies of the free-standing PPy films viewed with low magnifications. The thin PPy films, especially the one prepared with a very low  $[\text{Py}]$  (0.024 M), are very smooth and uniform. For the film made with a higher  $[\text{Py}]$  (0.12 M), only some small particles are present on the surface.

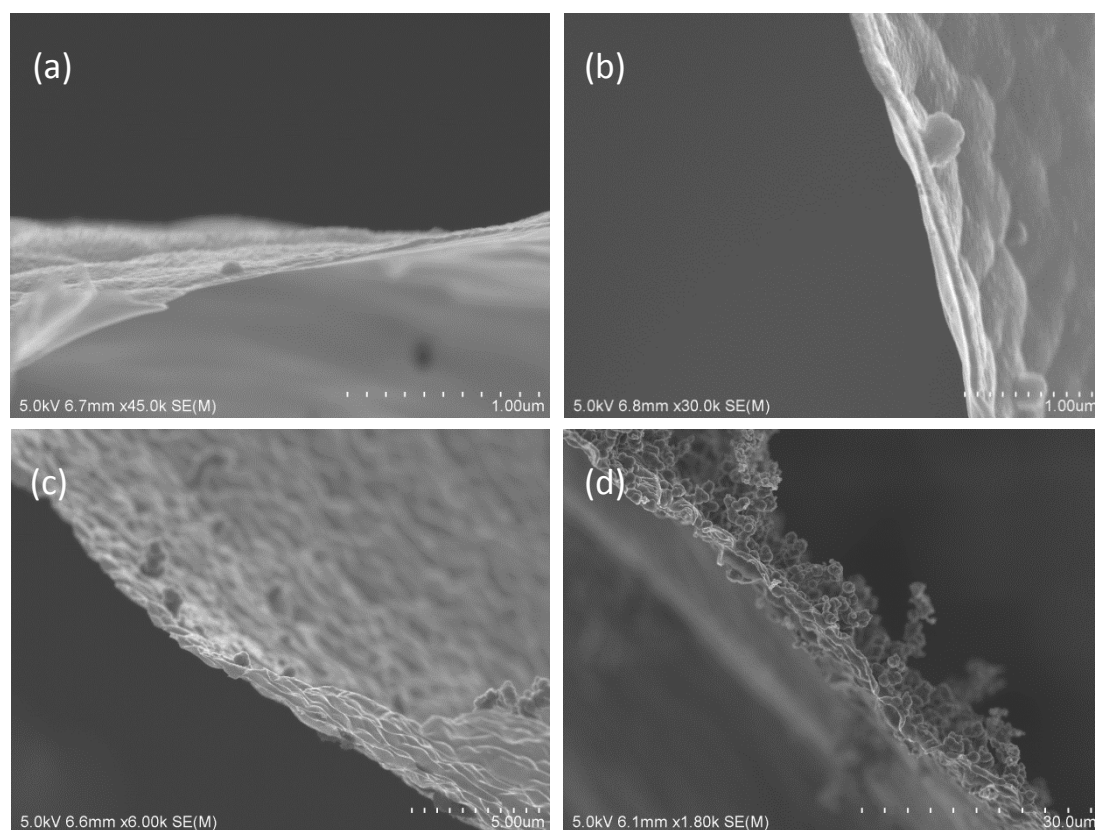

Fig. S5. Cross-sectional SEM images of the PPy films prepared with different pyrrole concentrations. Synthetic conditions: [Py]=0.012 M (a), 0.024 M (b), 0.048 M (c), and 0.48 M (d); [FeCl<sub>3</sub>]=[PTS]=0.36 M, reaction time=25 min.
